# Supplementary material for: Combination Therapy of High-Dose Rabeprazole Plus Metronomic Capecitabine in Advanced Gastro-Intestinal Cancer: A Randomized Phase II Trial
Source: PubMed Central journal article supplement (PMC7690608; doi:10.3390/cancers12113084), 2020-10-22
Supplement: cancers-12-03084-s001.pdf [file cancers-12-03084-s001.pdf]

# Supplementary Materials: Combination Therapy of High-Dose Rabeprazole Plus Metronomic Capecitabine in Advanced Gastro-Intestinal Cancer: A Randomized Phase II Trial

Michela Roberto, Adriana Romiti, Federica Mazzuca, Annalisa Milano, Chiara D'Antonio, Luana Lionetto, Rosa Falcone, Lidia Strigari, Maurizio Simmaco, Stefano Fais and Paolo Marchetti

**Table S1.** Adverse Events according to CTCAE criteria reported in the two groups.

| Group            | n. (%) | Anemia | Neutropenia | Thrombocytopenia | Diarrhea | Nausea | Vomiting |
|------------------|--------|--------|-------------|------------------|----------|--------|----------|
| mCAP+rabeprazole | G1     | 2      | 1           | 0                | 4        | 2      | 1        |
|                  | G2     | 0      | 0           | 0                | 3        | 1      | 0        |
| mCAP             | G1     | 2      | 0           | 0                | 1        | 1      | 1        |
|                  | G2     | 1      | 0           | 1                | 2        | 1      | 0        |

**Publisher's Note:** MDPI stays neutral with regard to jurisdictional claims in published maps and institutional affiliations.

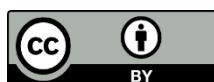

© 2020 by the authors. Licensee MDPI, Basel, Switzerland. This article is an open access article distributed under the terms and conditions of the Creative Commons Attribution (CC BY) license (<http://creativecommons.org/licenses/by/4.0/>).
